# Supplementary material for: Efficient Cr(vi) removal by expanded graphite synergized with oxalic acid under UV irradiation
Source: Royal Society of Chemistry journal article supplement (doi:10.1039/d3ra01207g), 2023-01-01
Supplement: d3ra01207g1.pdf [file d3ra01207g1.pdf]

## **Supporting Information**

### **Efficient Cr(VI) removal by expanded graphite synergized with oxalic acid under UV irradiation**

Ling Zhang, Yanqing Sun\*, Jie Sun , Fengming Cao

*School of Environmental and Chemical Engineering, Shanghai University,  
333 Nanchen Road, Shanghai 200444, P.R. China*

\*Corresponding author: Yanqing Sun, Tel.: +86 15001770665; E-mail:

wqbiss@163.com

**Table S1.** Comparison of Cr(VI) elimination performance for EG+Ox+UV with the reported carbon-based material and Ox-involved system.

| Material                                                              | Cr(VI) (mg L <sup>-1</sup> ) | Dosage (g L <sup>-1</sup> ) | Removal efficiency | References |
|-----------------------------------------------------------------------|------------------------------|-----------------------------|--------------------|------------|
| SA/PEI/GO                                                             | 50                           | 1                           | 14 h; 97.7 %       | [1]        |
| g-C <sub>3</sub> N <sub>4</sub> /GO/BiFeO <sub>3</sub>                | 5                            | 2.5                         | 90 min; 100 %      | [2]        |
| GO                                                                    | 1 mM (≈ 52)                  | 0.2                         | 15 h; 96 %         | [3]        |
| TNTs/MAC                                                              | 10                           | 1                           | 330 min; 97 %      | [4]        |
| Lep-Ox-Cr(VI)                                                         | 10                           | 0.5                         | 60 min; 100 %      | [5]        |
| g-C <sub>3</sub> N <sub>4</sub> /ZnFe <sub>2</sub> O <sub>4</sub> -Ox | 60 μM (≈ 3.12)               | 0.01                        | 120 min; 100%      | [6]        |
| EG+Ox+UV                                                              | 1 mM (≈ 52)                  | 0.5                         | 60 min; 99.32 %    | This work  |

## Supplementary references

1. C. Guo, S. Wu, X. Gao, M. Li and H. Long, *Int J Biol Macromol*, 2021, **189**, 910-920.
2. X. Hu, W. Wang, G. Xie, H. Wang, X. Tan, Q. Jin, D. Zhou and Y. Zhao, *Chemosphere*, 2019, **216**, 733-741.
3. Z. Ding, W. Zhang, J. Liang, S. Qiang, W. Wang, P. Li and Q. Fan, *Chemosphere*, 2023, **311**, 137136.
4. S. G. Hosseini and J. V. Pasikhani, *Environ Technol*, 2021, **42**, 914-931.
5. S. Hu, H. Li, P. Wang, C. Liu, Z. Shi, F. Li and T. Liu, *Chemical Geology*, 2021, **583**, 120481.
6. D. Lei, J. Xue, X. Peng, S. Li, Q. Bi, C. Tang and L. Zhang, *Applied Catalysis B: Environmental*, 2021, **282**, 119578.
